# Supplementary material for: Increased risk of brain metastases in women with breast cancer and p16 expression in metastatic lymph-nodes
Source: PubMed Central journal article supplement (PMC5514912; doi:10.18632/oncotarget.16953), 2017-04-08
Supplement: oncotarget-08-37332-s001.pdf [file oncotarget-08-37332-s001.pdf]

# Increased risk of brain metastases in women with breast cancer and p16 expression in metastatic lymph-nodes

## Supplementary Materials

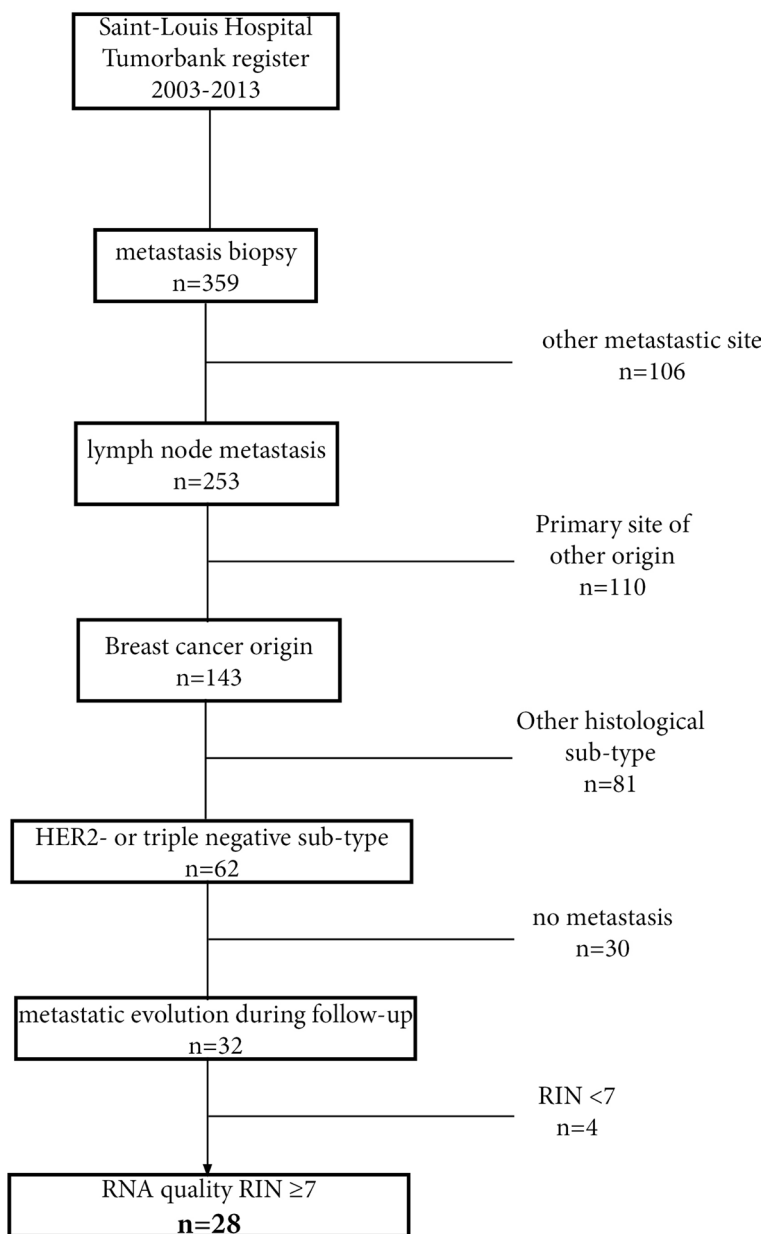

Supplementary Figure 1: Diagram for selection criteria of the 28 patients of the experimental series.

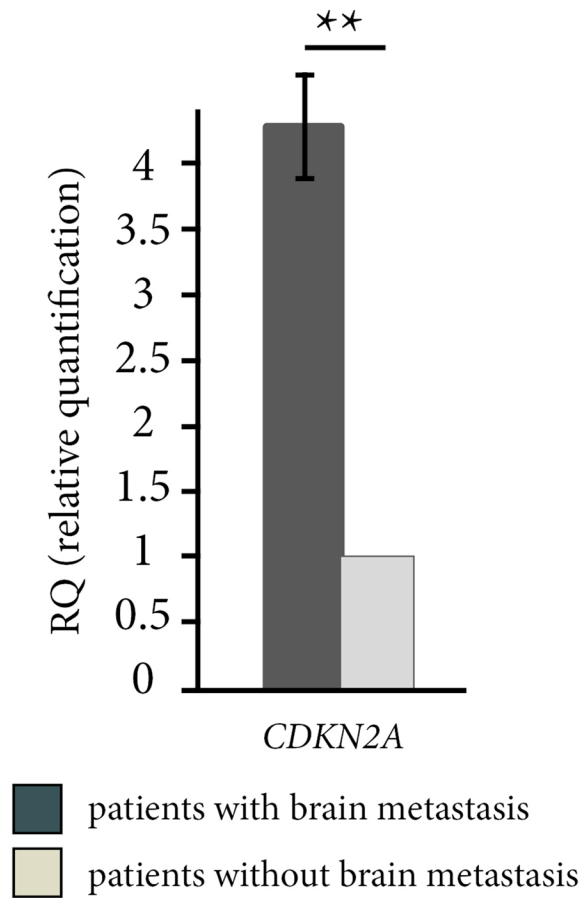

**Supplementary Figure 2: CDKN2A mRNA expression in metastatic lymph nodes.** CDKN2A mRNA expression is significantly higher in metastatic lymph nodes of women with brain metastases than in women without brain metastases.  $**p < 0.01$ ,  $*p < 0.05$ .

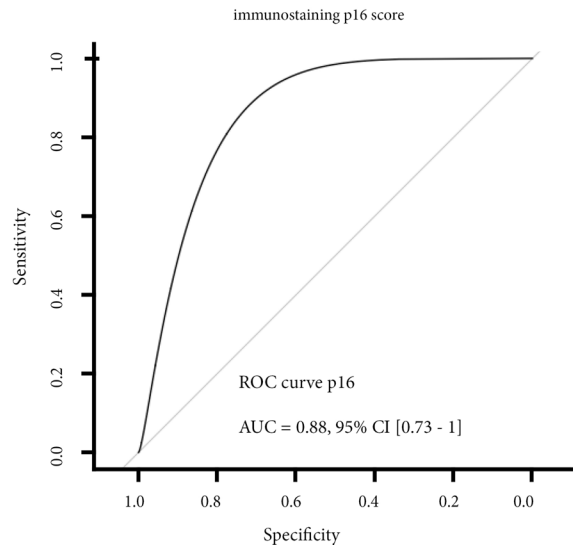

**Supplementary Figure 3: ROC curve of the p16 immunostaining score to predict brain metastasis occurring within 3 years following initial diagnosis.** Sensitivity and specificity were computed for each value of the quantitative immunohistochemical staining score. ROC: receiver operating characteristics AUC: area under the curve CI: confidence interval.

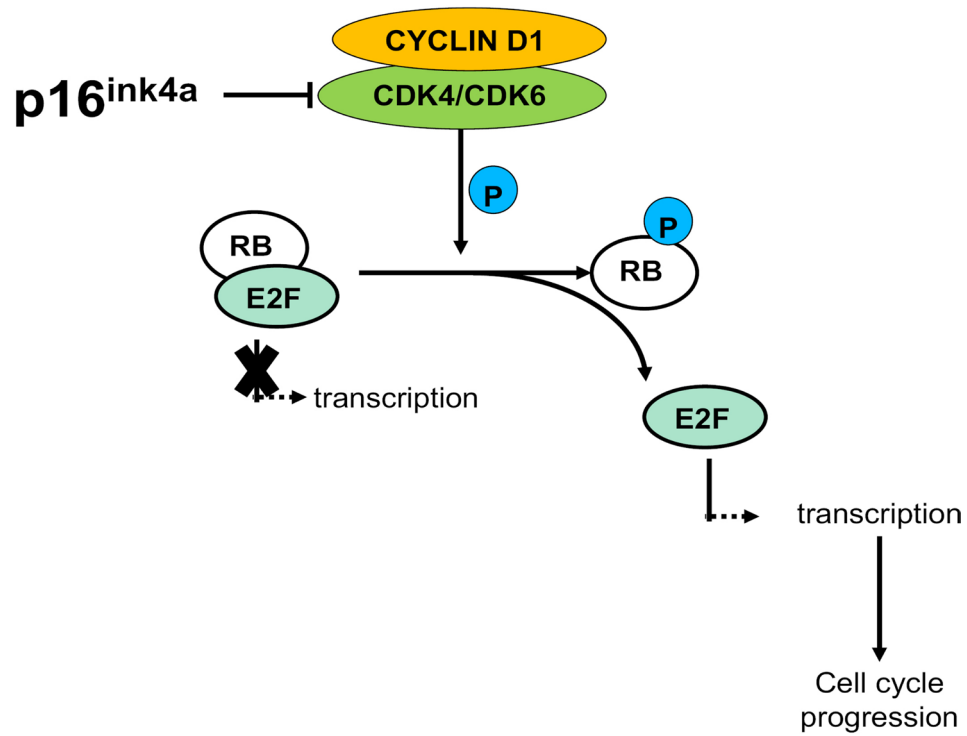

**Supplementary Figure 4: RB signaling pathway.** p16<sup>ink4a</sup> inhibits cyclin-dependent kinases CDK4 and CDK6, and prevents phosphorylation of retinoblastoma tumor suppressor (RB). RB represses the activity of the E2F family of transcription factors and blocks cell cycle progression.

**Supplementary Table 1: Individual characteristics of the 28 patients with metastatic lymph nodes**

| N° | Brain metastases | Histological sub-type |      | Stage at initial diagnosis | Delay between initial diagnosis and metastatic relapse (months) | Metastatic sites at first relapse | Clinical state at the time of analysis |
|----|------------------|-----------------------|------|----------------------------|-----------------------------------------------------------------|-----------------------------------|----------------------------------------|
|    |                  | TNBC                  | HER2 |                            |                                                                 |                                   |                                        |
| 1  | Yes              | Yes                   | No   | T2N3M0                     | 15                                                              | Liver                             | Dead                                   |
| 2  | Yes              | Yes                   | No   | T3N1M0                     | 23                                                              | Liver, bone                       | Dead                                   |
| 3  | Yes              | Yes                   | No   | T4dN1M0                    | 6                                                               | Brain                             | Dead                                   |
| 4  | Yes              | Yes                   | No   | T2N0M0                     | 17                                                              | Liver, lung, lymph node           | Dead                                   |
| 5  | Yes              | Yes                   | No   | T4dN3M1                    | 0                                                               | Lung                              | Dead                                   |
| 6  | Yes              | Yes                   | No   | T2N3M1                     | 0                                                               | Bone, brain                       | Dead                                   |
| 7  | Yes              | Yes                   | No   | T3N1M0                     | 17                                                              | Brain                             | Dead                                   |
| 8  | Yes              | Yes                   | No   | T2N0M0                     | 14                                                              | Bone, lung, lymph node            | Dead                                   |
| 9  | Yes              | No                    | Yes  | T2N1M0                     | 57                                                              | Liver                             | Dead                                   |
| 10 | Yes              | No                    | Yes  | T2N0M0                     | 84                                                              | Lung, lymph node                  | Dead                                   |
| 11 | Yes              | No                    | Yes  | T2N2M1                     | 0                                                               | Lung                              | Dead                                   |
| 12 | Yes              | No                    | Yes  | T4dN3M1                    | 0                                                               | Bone                              | Dead                                   |
| 13 | Yes              | No                    | Yes  | T4dN2M1                    | 0                                                               | Bone                              | Dead                                   |
| 14 | No               | Yes                   | No   | T4bN2M1                    | 0                                                               | Liver, bone                       | Dead                                   |
| 15 | No               | Yes                   | No   | T3N1M0                     | 30                                                              | Lung                              | Dead                                   |
| 16 | No               | Yes                   | No   | T3N1M0                     | 29                                                              | Lung                              | Dead                                   |
| 17 | No               | Yes                   | No   | T2N0M0                     | 67                                                              | Lung, lymph node                  | Dead                                   |
| 18 | No               | Yes                   | No   | T2N0M0                     | 132                                                             | Liver, lung, lymph node           | Dead                                   |
| 19 | No               | Yes                   | No   | T3N2M0                     | 22                                                              | Liver, lung                       | Dead                                   |
| 20 | No               | Yes                   | No   | T1N0M0                     | 73                                                              | Bone, lung, lymph node            | Dead                                   |
| 21 | No               | Yes                   | No   | T1N1M0                     | 86                                                              | Liver, bone, lung                 | Dead                                   |
| 22 | No               | No                    | Yes  | T4dN2M1                    | 0                                                               | Liver, bone                       | Alive without disease                  |
| 23 | No               | No                    | Yes  | T4bN2M1                    | 0                                                               | Lung                              | Alive without disease                  |
| 24 | No               | No                    | Yes  | T2N3M0                     | 129                                                             | Bone                              | Alive without disease                  |
| 25 | No               | No                    | Yes  | T4dN1M1                    | 0                                                               | Bone                              | Alive without disease                  |
| 26 | No               | No                    | Yes  | T3N2M1                     | 0                                                               | Liver, bone                       | Dead                                   |
| 27 | No               | No                    | Yes  | T2N1M0                     | 24                                                              | Skin, lung, lymph node            | Alive without disease                  |
| 28 | No               | No                    | Yes  | T2N1M0                     | 76                                                              | Skin, liver, lung                 | Dead                                   |

**Supplementary Table 2: Characteristics of patients with available published transcriptomic data**

|                                                    | HG-U133A GeneChip arrays<br><i>N</i> = 583 | HG-U133A plus 2.0 GeneChip<br>arrays <i>N</i> = 204 |
|----------------------------------------------------|--------------------------------------------|-----------------------------------------------------|
| HER2 histological sub-type <i>N</i> (%)            |                                            |                                                     |
| Yes                                                | 26 (4.5)                                   | 54 (26.5)                                           |
| No                                                 | 62 (10.6)                                  | 150 (73.5)                                          |
| ND                                                 | 495 (84.9)                                 |                                                     |
| Triple negative histological sub-type <i>N</i> (%) | 39 (6.7)                                   | 60 (29.4)                                           |
| Occurrence of brain metastases <i>N</i> (%)        |                                            |                                                     |
| Yes                                                | 86 (14.7)                                  | 16 (7.8)                                            |
| No                                                 | 480 (82.3)                                 | 188 (92.2)                                          |
| ND                                                 | 17 (3)                                     |                                                     |

ND: not determined.

**Supplementary Table 3: Characteristics of the 24 patients of the validation series**

|                                                                 | Group With brain<br>metastases <i>N</i> = 16 | Group Without brain metastases <i>N</i> = 8 |
|-----------------------------------------------------------------|----------------------------------------------|---------------------------------------------|
| Median age at diagnosis (range)                                 | 46 years (33–62)                             | 59 years (32–72)                            |
| Median survival from diagnosis of metastatic<br>disease (range) | 30.5 months<br>(2.4–141.9)                   | 34.3 months<br>(15.6–79.7)                  |
| Histological sub-type <i>N</i> (%)                              |                                              |                                             |
| HER2-overexpressed                                              | 8 (50)                                       | 5 (62.5)                                    |
| Triple negative                                                 | 8 (50)                                       | 3 (37.5)                                    |
| Site of metastatic biopsy sample <i>N</i> (%)                   |                                              |                                             |
| Lymph node                                                      | 16 (100)                                     | 8 (100)                                     |

**Supplementary Excel File 1: SamplInfoA\_605.** See Supplementary\_Excel\_File\_1

**Supplementary Excel File 2: SamplInfoP2\_204.** See Supplementary\_Excel\_File\_2
